# Supplementary material
Source: PubMed Central journal article supplement (PMC4793988)
Supplement: steb020997.ww1_default.pdf [file steb020997.ww1_default.pdf]

**Appendix 1** Baseline characteristics of the analytical sample compared to remaining age-eligible participants from the Dijon centre\* [posted as supplied by author]

|                                                  | <b>Participants included in the analysis (n = 1,721)</b> | <b>Dijon participants (≤80 years) not included in the analysis (n = 2,155)</b> |
|--------------------------------------------------|----------------------------------------------------------|--------------------------------------------------------------------------------|
| <b>Age (Mean (SD))</b>                           | 72.4 (4.1)                                               | 73.3 (4.0)                                                                     |
| <b>Sex (% , n)</b>                               |                                                          |                                                                                |
| - Male                                           | 39.3 (677)                                               | 36.3 (783)                                                                     |
| - Female                                         | 60.7 (1,044)                                             | 63.7 (1,372)                                                                   |
| <b>Education (% , n)</b>                         |                                                          |                                                                                |
| - High                                           | 36.3 (625)                                               | 30.1 (648)                                                                     |
| - Intermediate                                   | 31.6 (543)                                               | 32.3 (695)                                                                     |
| - Low (None or up to primary school)             | 32.1 (553)                                               | 37.7 (812)                                                                     |
| <b>Mini Mental State Examination (Mean (SD))</b> | 27.7 (1.8)                                               | 27.4 (1.9)                                                                     |

+ Participants with prevalence dementia and missing incident dementia status were excluded from both samples
