# Supplementary material
Source: PubMed Central journal article supplement (PMC4793988)
Supplement: steb020997.ww2_default.pdf [file steb020997.ww2_default.pdf]

**Appendix 2:** Age and education adjusted cut-off scores for cognitive impairment (defined as the 10<sup>th</sup> percentile) [posted as supplied by author]

|                      | <b>Mini Mental State<br/>Examination</b> | <b>Benton Visual<br/>Retention Test</b> | <b>Digit Span</b> |
|----------------------|------------------------------------------|-----------------------------------------|-------------------|
| 65-74/Low Education  | 24                                       | 9                                       | 3                 |
| 65-74/High Education | 26                                       | 10                                      | 4                 |
| 75-84/Low Education  | 24                                       | 8                                       | 4                 |
| 75-84/High Education | 26                                       | 9                                       | 4                 |
| 85+/Low Education    | 22                                       | 7                                       | 3                 |
| 85+/High Education   | 24                                       | 9                                       | 4                 |
